# Supplementary material for: Glycerol-based extracts of Clitoria ternatea (Butterfly Pea Flower) with enhanced antioxidant potential
Source: PeerJ journal article supplement (doi:10.7717/peerj-achem.30), 2024-01-24
Supplement: PeerJ_Raw_results.xlsx [file PeerJ_Raw_results.xlsx]

## Sheet: DPPH
DPPH
	water extract
	conc	1	2	3	avrg	stdev
	0	0	0	0	0	0
	0.15625	4.62748	5.94796	1.50725	4.02756	1.86188
	0.3125	5.52968	8.80755	2.72465	5.68729	2.48583
	0.625	13.3877	11.4384	9.04348	11.2898	1.77661
	1.25	20.2561	19.0735	15.3913	18.2403	2.07159
	2.5	28.2305	29.8256	29.5362	29.1974	0.693854
	5	47.6135	48.6989	41.6232	45.9785	3.1114
	10	75.844	76.4369	73.6522	75.311	1.19771
	ethanol extract
	conc	1	2	3	avrg	stdev
	0	0	0	0	0	0
	0.15625	-4.78547	4.8731	7.45402	2.51388	5.26787
	0.3125	-3.19032	-2.53807	10.1162	1.46259	6.12479
	0.625	-5.0055	4.92386	7.50242	2.47359	5.39227
	1.25	-2.20022	4.92386	15.4889	6.07083	7.26694
	2.5	5.33553	11.4213	16.6021	11.1197	4.60451
	5	12.1562	15.8883	23.5721	17.2056	4.75269
	10	32.1782	34.5685	41.6747	36.1405	4.03313
	glycerol extract
	conc	1	2	3	avrg	stdev
	0	0	0	0	0	0
	0.15625	6.41667	7.47738	8.12721	7.34042	0.705009
	0.3125	1.83333	10.9012	8.16647	6.96701	3.79787
	0.625	8.79166	20.3463	16.6078	15.2486	4.81408
	1.25	26.4167	19.5199	22.1437	22.6934	2.84231
	2.5	27	27.0366	31.1739	28.4035	1.95904
	5	49.375	48.5242	48.8418	48.9137	0.351035
	10	86.0417	84.3762	82.4499	84.2893	1.4676
	G/W extract
	conc	1	2	3	avrg	stdev
	0	0	0	0	0	0
	0.15625	4.87805	4.35452	-0.580052	2.88417	2.45888
	0.3125	10.6326	6.2813	1.85614	6.25669	3.58303
	0.625	12.5	10.7129	10.3248	11.1792	0.947261
	1.25	22.8659	18.6127	18.0588	19.8458	2.14746
	2.5	35.4421	31.2909	28.809	31.8473	2.73638
	5	50.4192	52.5241	49.2653	50.7362	1.34915
	10	86.6235	85.2794	86.3109	86.0713	0.574293
	ascorbic acid (ug/ml)							ascorbic acid (mg/ml)
	conc	1	2	3	avrg	stdev		conc	avrg	stdev
	0	0	0	0	0	0		0	0	0
	0.390625	-4.01941	1.16978	-1.92567	-1.59177	2.1316		0.0004	-1.59177	2.1316
	0.78125	0.485102	2.17246	-2.06081	0.198917	1.74003		0.0008	0.198917	1.74003
	1.5625	-3.91546	1.67112	-4.5608	-2.26838	2.79808		0.0016	-2.26838	2.79808
	3.125	0.207893	4.47861	5.03418e-06	1.56217	2.06398		0.0031	1.56217	2.06398
	6.25	3.84615	11.9987	7.9054	7.91674	3.32826		0.0063	7.91674	3.32826
	12.5	11.9889	14.9398	16.4865	14.4717	1.86572		0.0125	14.4717	1.86572
	25	34.1649	36.1297	36.3514	35.5487	0.982614		0.025	35.5487	0.982614
	IC 50 & EC 50
		IC50	EC50
	ethanol	14.0364 ± 1.3235	14.0362 ± 1.3233
	water	6.0604 ± 0.2138	6.0604 ± 0.2138
	glycerol	5.4054 ± 0.0239	5.4054 ± 0.0239
	G/W	5.3483 ± 0.0720	5.3079 ± 0.1183
	ascorbic acid	0.0355 ± 0.0014	0.0355 ± 0.0001
	1	14.0364	14.0362
	2	6.0604	6.0604
	3	5.4054	5.4054
	4	5.3483	5.3079
	5	0.0355	0.0355
		3.988

## Sheet: TFC 
TFC Results for QE Standard
CONC mg	1	2	3	average absorbance (y)
0	0.0599	0.0593	0.0594	0.0595333
62.5	0.0611	0.0734	0.0699	0.0681333
125	0.0713	0.0772	0.0701	0.0728667
250	0.0732	0.0797	0.0771	0.0766667
500	0.1535	0.1557	0.1511	0.153433
1000	0.2705	0.2611	0.2507	0.260767
														EE: BPF extract (ethanol)
														WE: BPF extract (water)
														GE: BPF extract (glycerol)
														GWE: BPF extract (glycerol and water mix)
TFC Results for Extracts (10mg/mL)
						mg QE/0.01g
	Absorbance			Average	Concentration	mg QE/ml	mg QE/g
EE	0.0709	0.0772	0.0767	0.0749333	134.167	0.134167	13.4167	0.01 this one does not count into the results
WE	0.0629	0.062	0.0697	0.0648667	83.8333	0.0838333	8.38333
GE	0.0745	0.0689	0.0691	0.0708333	113.667	0.113667	11.3667																REP	ethanol	water	glycerol	g/w
GWE	0.0715	0.0689	0.0697	0.0700333	109.667	0.109667	10.9667																1	0.127526	0.0806866	0.13266	0.166667
																							2	0.0986525	0.0680141	0.209817	0.152711
TFC Results for Solvent only																							3	0.0928778	0.0689766	0.14437	0.183831
						mg QE/0.03g																	avrg	0.106352	0.0725591	0.162282	0.167736
	Absorbance			Average	Concentration	mg QE/ml	mg QE/g
EtOH	0.0612	0.0611	0.0648	0.0623667	71.3333	0.0713333	2.37778																REP	ethanol	water	glycerol	g/w
H2O	0.0625	0.0652	0.0602	0.0626333	72.6667	0.0726667	2.42222																1	0.220275	0.084891	0.250389	0.249091
Glycerol	0.0659	0.0583	0.0581	0.0607667	63.3333	0.0633333	2.11111																2	0.186397	0.121625	0.198598	0.193146
GW (1:1)	0.0632	0.0579	0.0691	0.0634	76.5	0.0765	2.55																3	0.246625	0.139148	0.209891	0.21054
																							avrg	0.217766	0.115222	0.219626	0.217593
TFC Results for Extracts (30mg/mL) - REP 1
						mg QE/0.03g
	Absorbance			Average	Concentration	mg QE/ml	mg QE/g
EE	0.0726	0.073	0.0782	0.0746	132.5	0.1325	4.41667					per ml		REP	ethanol	water	glycerol	g/w
WE	0.0629	0.062	0.0697	0.0648667	83.8333	0.0838333	2.79444							1	0.1325	0.0838	0.1378	0.1587
GE	0.0748	0.0749	0.0773	0.0756667	137.833	0.137833	4.59444							2	0.1025	0.0707	0.218	0.1732
GWE	0.0817	0.0835	0.083	0.0827333	173.167	0.173167	5.77222							3	0.0965	0.0717	0.15	0.191
														avrg	0.1105	0.0754	0.1686	0.1743
TFC Results for Extracts (30mg/mL) - REP 2
						mg QE/0.03g
	Absorbance			Average	Concentration	mg QE/ml	mg QE/g					per g		REP	ethanol	water	glycerol	g/w
EE	0.0692	0.068	0.0686	0.0686	102.5	0.1025	3.41667							1	4.4167	2.7944	4.5944	5.7722
WE	0.0628	0.0616	0.0623	0.0622333	70.6667	0.0706667	2.35556							2	3.4167	2.3556	7.2667	5.2889
GE	0.0914	0.0919	0.0918	0.0917	218	0.218	7.26667							3	3.2167	2.3889	5	6.3667
GWE	0.0793	0.0801	0.0801	0.0798333	158.667	0.158667	5.28889							avrg	3.68337	2.51297	5.62037	5.80927
TFC Results for Extracts (30mg/mL) - REP 3
						mg QE/0.03g
	Absorbance			Average	Concentration	mg QE/ml	mg QE/g
EE	0.067	0.0675	0.0677	0.0674	96.5	0.0965	3.21667
WE	0.0625	0.0624	0.0624	0.0624333	71.6667	0.0716667	2.38889
GE	0.0781	0.0782	0.078	0.0781	150	0.15	5
GWE	0.0866	0.0862	0.0861	0.0863	191	0.191	6.36667
	stdev	tpc	tfc
	ee	0.0302	0.0185
	we	0.0277	0.0071
	ge	0.0272	0.0416
	gwe	0.0526	0.0156

## Sheet: TPC
TPC Results for GAE Standard
CONC ug/ml (x)	1	2	3	average absorbance (y)
0	0.0923	0.0963	0.1038	0.0974667
50	0.0953	0.0953	0.0957	0.0954333
100	0.1243	0.1252	0.1278	0.125767
250	0.1464	0.15	0.1511	0.149167
500	0.2204	0.2264	0.231	0.225933
1000	0.3433	0.3469	0.3539	0.348033
TPC Results for Extracts (REP 1)
						mg GAE/0.01g
	Absorbance			Average	Concentration	mg GAE/ml	mg GAE/g							EE: BPF extract (ethanol)
EE	0.1499	0.151	0.1457	0.148867	188.556	0.188556	18.8556							WE: BPF extract (water)
WE	0.1093	0.1146	0.1184	0.1141	72.6667	0.0726667	7.26667							GE: BPF extract (glycerol)
GE	0.1518	0.1548	0.1632	0.1566	214.333	0.214333	21.4333							GWE: BPF extract (glycerol and water mix)
GWE	0.1525	0.1589	0.1574	0.156267	213.222	0.213222	21.3222
														REP	ethanol	water	glycerol	g/w
														1	0.220275	0.084891	0.250389	0.249091
TPC Results for Solvent														2	0.186397	0.121625	0.198598	0.193146
						mg GAE/0.01g								3	0.246625	0.139148	0.209891	0.21054
	Absorbance			Average	Concentration	mg GAE/ml	mg GAE/g							avrg	0.217766	0.115222	0.219626	0.217593
Ethanol	0.1308	0.1307	0.1102	0.1239	105.333	0.105333	10.5333
Water	0.1062	0.1034	0.1036	0.1044	40.3333	0.0403333	4.03333
Glycerol	0.0684	0.0867	0.0609	0.072	-67.6667	-0.0676667	-6.76667					per ml		REP	ethanol	water	glycerol	g/w
GW (1:1)	0.0762	0.0799	0.0861	0.0807333	-38.5556	-0.0385556	-3.85556							1	0.1886	0.0727	0.2143	0.2132
														2	0.1596	0.1041	0.17	0.1653
TPC Results for Extracts (REP 2)														3	0.2111	0.1191	0.1797	0.1802
						mg GAE/0.01g								avrg	0.186433	0.0986333	0.188	0.186233
	Absorbance			Average	Concentration	mg GAE/ml	mg GAE/g
EE	0.1398	0.1416	0.1391	0.140167	159.556	0.159556	15.9556					per g		REP	ethanol	water	glycerol	g/w
WE	0.1225	0.1279	0.1202	0.123533	104.111	0.104111	10.4111							1	18.8556	7.26667	21.4333	21.3222
GE	0.145	0.1425	0.1424	0.1433	170	0.17	17							2	15.9556	10.4111	17	16.5333
GWE	0.1434	0.1427	0.1396	0.1419	165.333	0.165333	16.5333							3	21.1111	11.9111	17.9667	18.0222
														avrg	18.6407	9.86296	18.8	18.6259
TPC Results for Extracts (REP 3)
						mg GAE/0.01g
	Absorbance			Average	Concentration	mg GAE/ml	mg GAE/g
EE	0.1579	0.1499	0.1591	0.155633	211.111	0.211111	21.1111
WE	0.1309	0.1324	0.1208	0.128033	119.111	0.119111	11.9111
GE	0.1448	0.1456	0.1482	0.1462	179.667	0.179667	17.9667
GWE	0.1424	0.1479	0.1488	0.146367	180.222	0.180222	18.0222
